# Supplementary material for: Succinate uptake by T cells suppresses their effector function via inhibition of mitochondrial glucose oxidation
Source: Cell Rep. 2022 Aug 16;40(7):111193. doi: 10.1016/j.celrep.2022.111193 (PMC9638018; doi:10.1016/j.celrep.2022.111193)
Supplement: Document S1. Figures S1–S4 and Tables S1 and S2 [file mmc1.pdf]

**Cell Reports, Volume 40**

## **Supplemental information**

**Succinate uptake by T cells suppresses  
their effector function via inhibition  
of mitochondrial glucose oxidation**

**Nancy Gudgeon, Haydn Munford, Emma L. Bishop, James Hill, Taylor Fulton-Ward, David Bending, Jennie Roberts, Daniel A. Tennant, and Sarah Dimeloe**

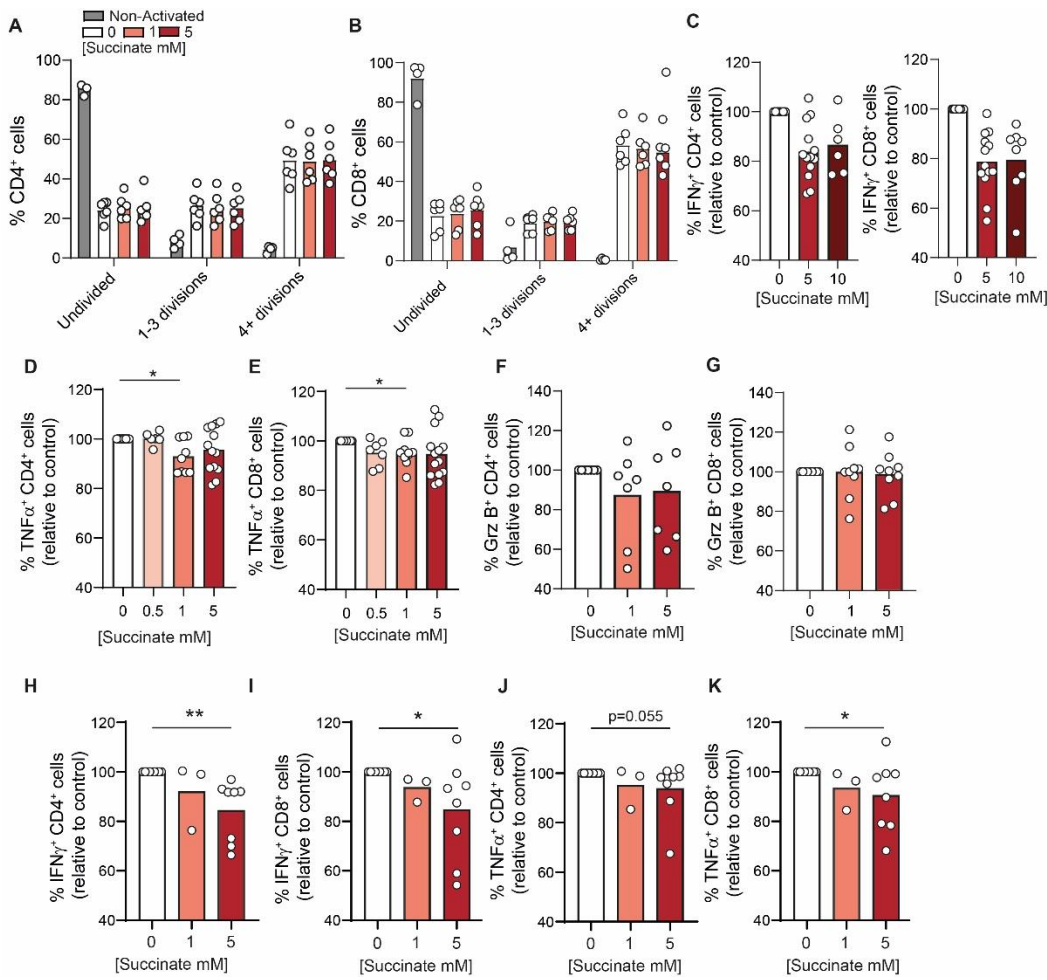

**Supplementary Figure 1, related to Figure 1: Effects of succinate on CD4<sup>+</sup> and CD8<sup>+</sup> T cell proliferation and effector functions.**

CD4<sup>+</sup> and CD8<sup>+</sup> T cells were activated for 72h *in vitro* in presence of exogenous succinate at indicated concentrations, and assessed for **(A-B)** proliferation (dilution of cell-trace violet) (n= 6 independent donors), **(C)** frequency of IFN- $\gamma$ -expressing cells (n= 6 to 14 independent donors) **(D-E)** frequency of TNF- $\alpha$ -expressing cells (n= 6 to 14 independent donors) and **(F-G)** Granzyme B (GrzB) expressing cells (n= 6 to 9 independent donors) by flow cytometry. **(H-K)** T cells within total human PBMC were activated for 48h in presence of exogenous succinate at indicated concentrations and assessed for frequency of IFN- $\gamma$ -expressing cells and TNF- $\alpha$ -expressing cells (n= 8 independent donors) by flow cytometry. Bars represent mean data. \*p<0.05, \*\*p<0.01

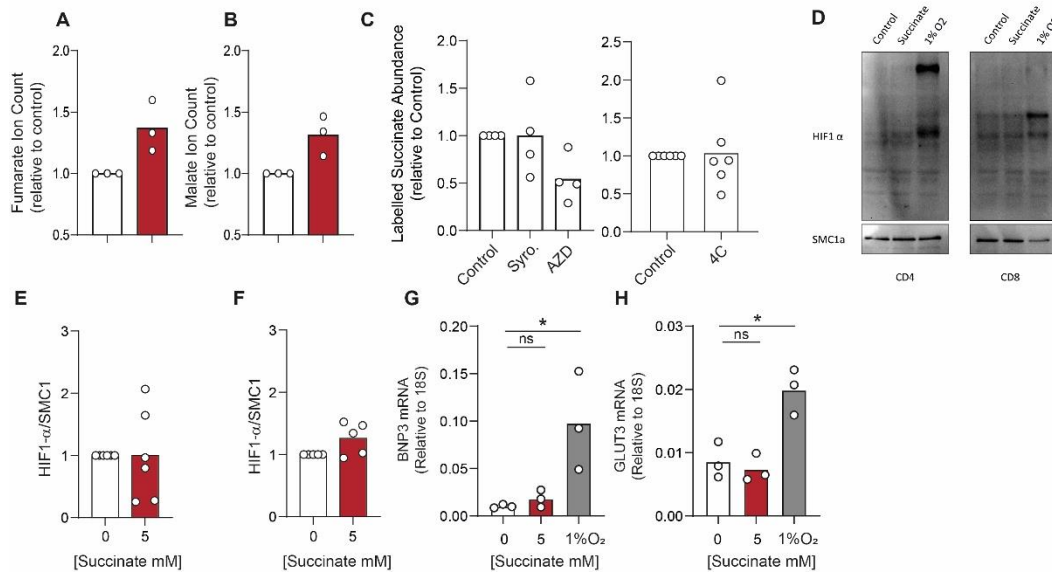

**Supplementary Figure 2, related to Figure 2: Effect of succinate on intracellular TCA cycle intermediate abundance and HIF-1α activity in T cells**

**(A-B)** CD4<sup>+</sup> T cells were activated for 72h *in vitro* in presence of 5mM succinate as indicated and assessed for intracellular fumarate and malate abundance (expressed as ion count normalised to the internal standard, D-6-glutaric acid) by GC-MS (n=3 independent donors) **(C)** CD4<sup>+</sup> T cells were activated for 72h in presence of 5mM fully <sup>13</sup>C-labeled succinate in absence and presence of the MCT1/4 inhibitor syrosingopine (10μM), MCT1 inhibitor AZD-3965 (10μM) or SUCNR1 inhibitor 4C (5μM) and assessed for mass isotopomer distribution (MID) of the succinate by GC-MS (n=3 independent donors). **(D-F)** CD4<sup>+</sup> and CD8<sup>+</sup> T cells were activated for 72h *in vitro* in presence of 5mM succinate and assessed for abundance of HIF-1α by western blot (n=5 independent donors). **(G-H)** CD4<sup>+</sup> T cells cultured as in (A) and additionally at 1% atmospheric O<sub>2</sub> were assessed for expression of **(G)** BNP3 and **(H)** Glut3 by qPCR (n=3 independent donors). Bars represent mean data. \*p<0.05, \*\*p<0.01.

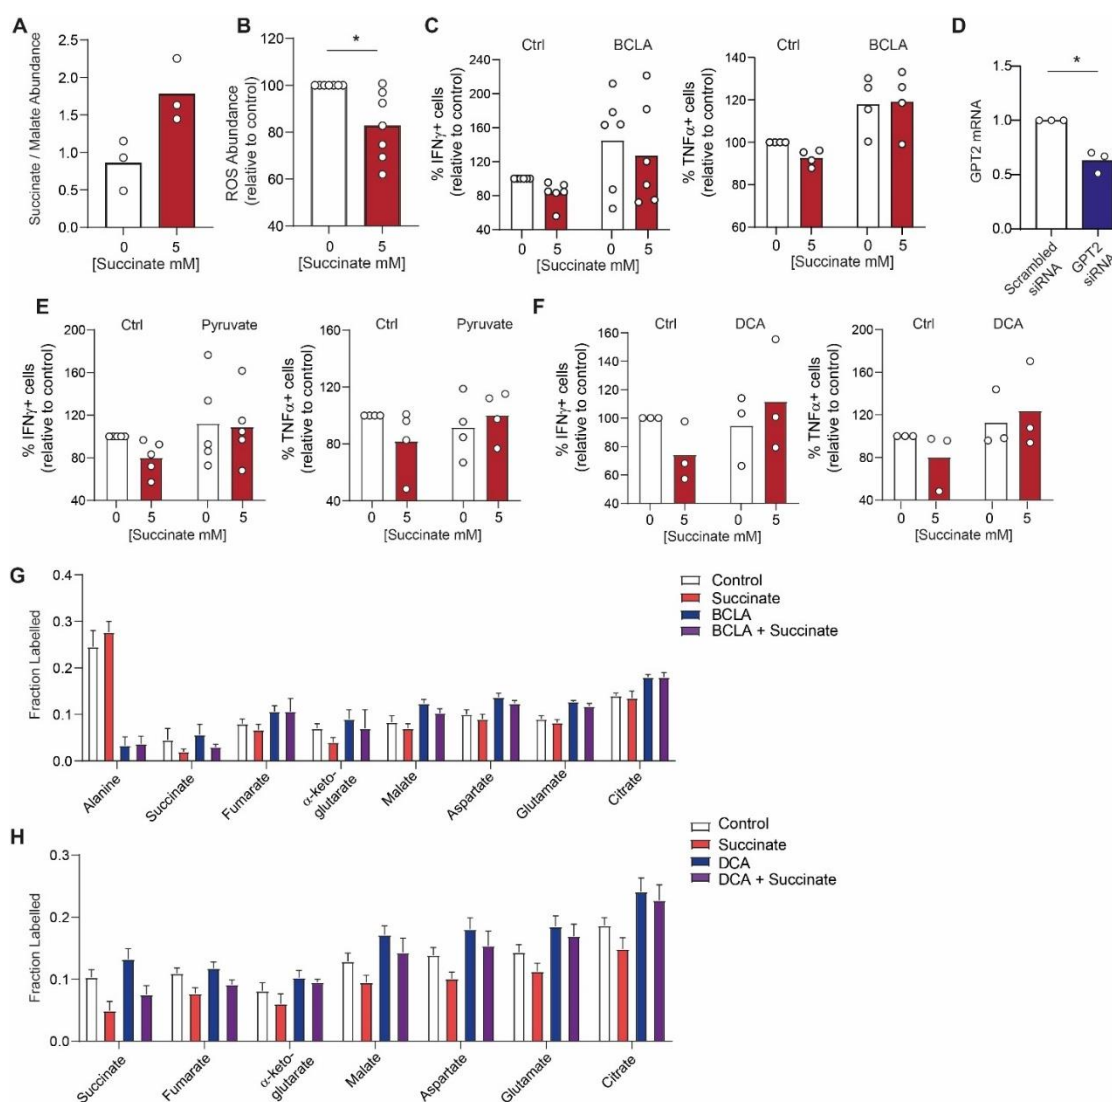

**Supplementary Figure 3, related to Figure 3: Succinate impairs T cell mitochondrial activity; interventions to restore mitochondrial glucose oxidation restore T cell effector function**

**(A)** CD4<sup>+</sup> T cells were activated for 72h *in vitro* in presence of 5mM succinate as indicated and assessed for intracellular succinate and malate abundance (expressed as a ratio of the ion counts normalised to the internal standard, D-6-glutaric acid) by GC-MS (n=3 independent donors). **(B)** CD4<sup>+</sup> T cells were activated as in (A) and assessed for total ROS abundance by flow cytometry following incubation with 2',7'-dichlorofluorescein diacetate (DCFDA) (n=7 independent donors). **(C)** CD8<sup>+</sup> T cells were activated for 72h *in vitro* in presence of exogenous succinate and/or 240 $\mu$ M of the GPT2 inhibitor  $\beta$ -chloro-L-alanine (BCLA) and assessed for the frequency of IFN- $\gamma$ - and TNF- $\alpha$ -expressing cells by flow cytometry (n=4 independent donors). **(D)** CD4<sup>+</sup> T cells were activated for 72h *in vitro* in presence of exogenous succinate and/or scrambled or GPT2-targeting siRNA and assessed for GPT2 mRNA abundance by qPCR (n=3 independent donors). **(E-F)** CD8<sup>+</sup> T cells were activated as in (D) in presence of succinate and/or pyruvate (10mM) or DCA (10mM) as indicated and assessed for the frequency of IFN- $\gamma$ - and TNF- $\alpha$ -expressing cells by flow cytometry (n=4/3 independent donors for pyruvate/DCA respectively). Bars represent mean data. **(G-H)** CD4<sup>+</sup> T cells were activated for 72h *in vitro* in presence of 5mM exogenous succinate and/or 240 $\mu$ M  $\beta$ -chloro-L-alanine (BCLA) or 10mM dichloroacetate (DCA) before incubation with fully <sup>13</sup>C-labelled glucose assessment of fractional labelling of the indicated metabolites by GC-MS (n=3 independent donors) Mean data +/-SEM are shown for G and H. \*p<0.05, \*\*p<0.01.

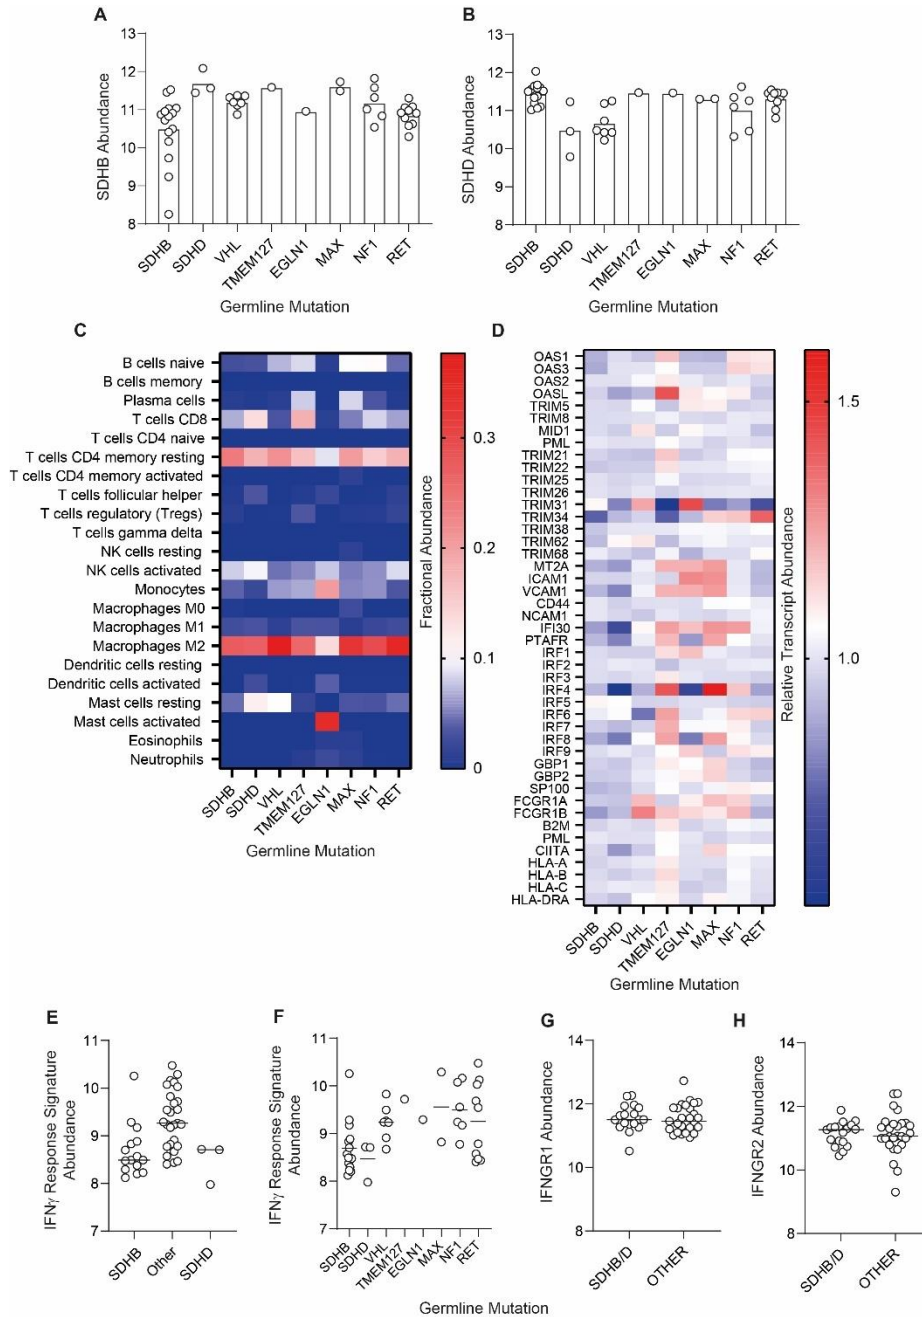

**Supplementary Figure 4, related to Figure 4: Gene expression data and immune cell fractional abundance in pheochromocytoma and paraganglioma with germline mutations in SDHB, SDHD or other genes** (A-B) Log2normalised counts for SDHB (A) and SDHD (B) in tumour samples of pheochromocytoma and paraganglioma with the indicated germline mutations, using RNA-sequencing data generated by Fishbein et al<sup>1</sup>. (C) CIBERSORTx analysis of the fractional abundance of indicated immune cell subsets in these samples. (D) Abundance of defined IFN- $\gamma$  response signature transcripts within the same dataset, expressed relative to the mean abundance of each transcript across all samples. (E-F) Geometric mean of Log2normalised counts for the IFN- $\gamma$  response transcripts in these samples, comparing SDHB, SDHD and other germline mutations (E) or comparing all germline mutations separately (F). (G-H) Log2normalised counts for IFNGR1 (G) and IFNGR2 (H) in samples with the indicated germline mutations Lines represent mean data.

**Supplementary Table 1, related to STAR methods:** Details of primers used for SYBRgreen qPCR analysis.

| Gene  | Forward               | Reverse                 |
|-------|-----------------------|-------------------------|
| BNIP3 | CAGGGCTCCTGGGTAGAACT  | CTACTCCGTCCAGACTCATGC   |
| GLUT3 | GCTGGGCATCGTTGTTGGA   | GCACTTTGTAGGATAGCAGGAAG |
| GPT2  | GACCCCGACAACATCTACCTG | TCATCACACCTGTCCGTGACT   |

**Supplementary Table 2, related to Figure 4 and supplementary Figure 4:** Details of IFN- $\gamma$  signature genes in Fig. 4/Supp. Fig. 4, constructed using Reactome pathway browser

| Gene    | Protein                                                           |
|---------|-------------------------------------------------------------------|
| OAS1    | 2'-5'-oligoadenylate synthetase 1                                 |
| OAS3    | 2'-5'-oligoadenylate synthetase 3                                 |
| OAS2    | 2'-5'-oligoadenylate synthetase 2                                 |
| OASL    | 2'-5'-oligoadenylate synthase-like protein                        |
| TRIM5   | Tripartite motif-containing protein 5                             |
| TRIM8   | Tripartite motif-containing protein 8                             |
| MID     | MID1 / Tripartite motif-containing protein 18                     |
| PML     | PML Nuclear Body Scaffold/ Tripartite motif-containing protein 19 |
| TRIM21  | Tripartite motif-containing protein 21                            |
| TRIM22  | Tripartite motif-containing protein 22                            |
| TRIM25  | Tripartite motif-containing protein 23                            |
| TRIM26  | Tripartite motif-containing protein 26                            |
| TRIM31  | Tripartite motif-containing protein 31                            |
| TRIM34  | Tripartite motif-containing protein 34                            |
| TRIM38  | Tripartite motif-containing protein 38                            |
| TRIM62  | Tripartite motif-containing protein 62                            |
| TRIM68  | Tripartite motif-containing protein 68                            |
| MT2A    | Metallothienin 2A                                                 |
| ICAM1   | Intercellular Adhesion Molecule 1                                 |
| VCAM1   | Vascular Cell Adhesion Molecule 1                                 |
| CD44    | CD44 / HCAM (homing cell adhesion molecule)                       |
| NCAM1   | Neural Cell Adhesion Molecule 1                                   |
| IFI30   | Gamma-interferon-inducible lysosomal thiol reductase              |
| PTAFR   | Platelet-activating factor receptor                               |
| IRF1    | Interferon regulatory factor 1                                    |
| IRF2    | Interferon regulatory factor 2                                    |
| IRF3    | Interferon regulatory factor 3                                    |
| IRF4    | Interferon regulatory factor 4                                    |
| IRF5    | Interferon regulatory factor 5                                    |
| IRF6    | Interferon regulatory factor 6                                    |
| IRF7    | Interferon regulatory factor 7                                    |
| IRF8    | Interferon regulatory factor 8                                    |
| IRF9    | Interferon regulatory factor 9                                    |
| GBP1    | Guanylate-binding protein 1                                       |
| GBP2    | Guanylate-binding protein 2                                       |
| SP100   | Nuclear autoantigen Sp-100                                        |
| FCGR1A  | High affinity immunoglobulin gamma Fc receptor I                  |
| FCGR1B  | High affinity immunoglobulin gamma Fc receptor IB                 |
| B2M     | Beta 2 microglobulin                                              |
| PML     | Protein PML                                                       |
| CIITA   | MHC class II transactivator                                       |
| HLA-A   | HLA-A                                                             |
| HLA-B   | HLA-B                                                             |
| HLA-C   | HLA-C                                                             |
| HLA-DRA | HLA-DR                                                            |
